# Supplementary material
Source: Springer Nature journal article supplement (https://www.springermedizin.de/resource/supplementary/40345_2013_21_MOESM6_ESM.pdf/25658314)
Supplement: MOESM6 [file 25658314]

Level of agreement=80%<sup>a</sup>

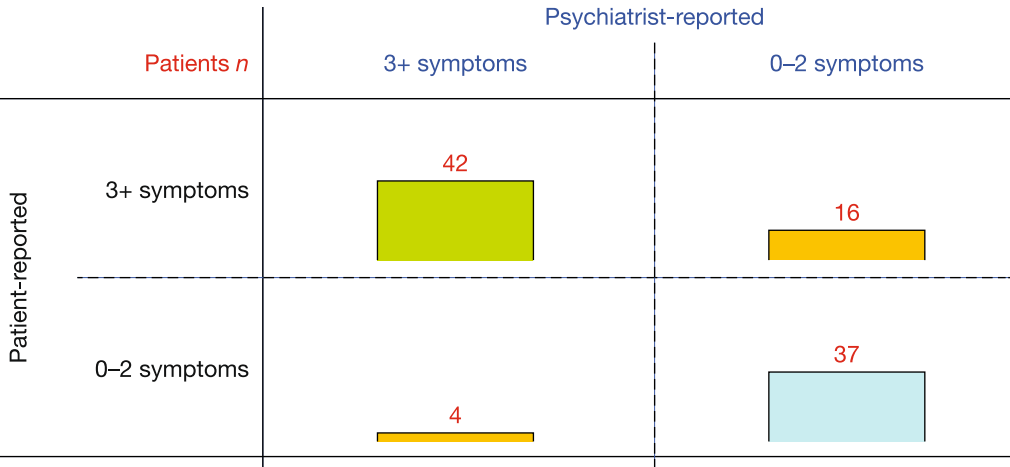

Sensitivity  
0.91

Specificity  
0.70

Positive  
predictive  
value  
0.72

Negative  
predictive  
value  
0.90

Cohen's kappa  
coefficient  
0.60
